# Supplementary material for: Physicochemical and biopharmaceutical characterization of dipalmitoyl phosphatidylcholine liposomes sterically stabilized by copolymers bearing short blocks of lipid-mimetic units
Source: Royal Society of Chemistry journal article supplement (doi:10.1039/b917275k), 2009-12-21
Supplement: b917275k.pdf [file b917275k.pdf]

## Supplementary Information

### Physicochemical and Biopharmaceutical Characterization of Dipalmitoyl Phosphatidylcholine Liposomes Sterically Stabilized by Copolymers Bearing Short Blocks of Lipid-Mimetic Units

D. Momekova, G. Momekov, S. Rangelov, G. Storm, N. Lambov

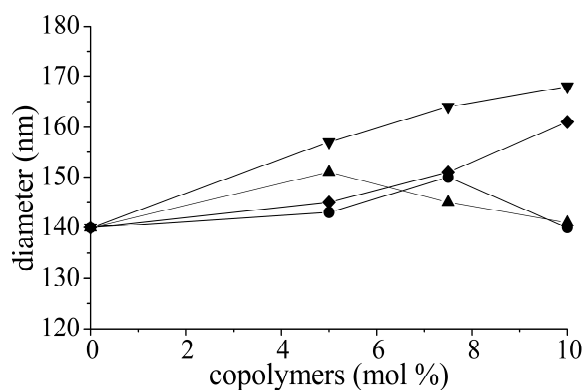

Figure SII. Variations of a hydrodynamic diameter of a series of DPPC:CHOL (2:1 molar ratio) liposomes, stabilized with: DDP(EO)<sub>52</sub> (●); DDP(EO)<sub>92</sub> (▲); (DDGG)<sub>2</sub>(EO)<sub>115</sub> (▼) and (DDGG)<sub>4</sub>(EO)<sub>114</sub> (◆) as a function of the copolymer content measured at an angle of 90° and temperature 25 °C.

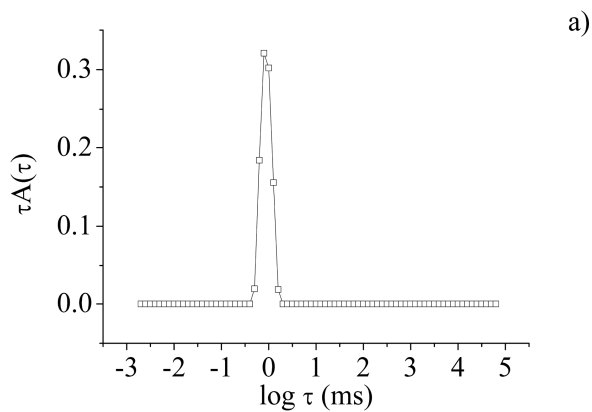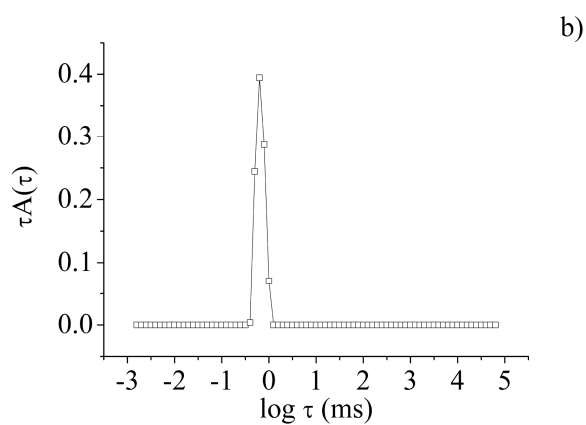

Figure SI2. Relaxation time ( $\tau$ ) distribution of DPPC:CHOL (2:1 molar ratio) liposomes, stabilized with (a) 7.5 mol % of  $(DDGG)_4(EO)_{114}$  at 25 °C and (b) 7.5 mol % of  $(DDGG)_4(EO)_{114}$  at 37 °C.
